# Supplementary material for: Olfactory receptor neurons use gain control and complementary kinetics to encode intermittent odorant stimuli
Source: eLife journal article supplement (doi:10.7554/elife.27670), 2017-06-27
Supplement: supp [file elife_poa_e27670_Figure_1_Supplement_3.pdf › elife_poa_e27670_Figure_1_Supplement_3.pdf]

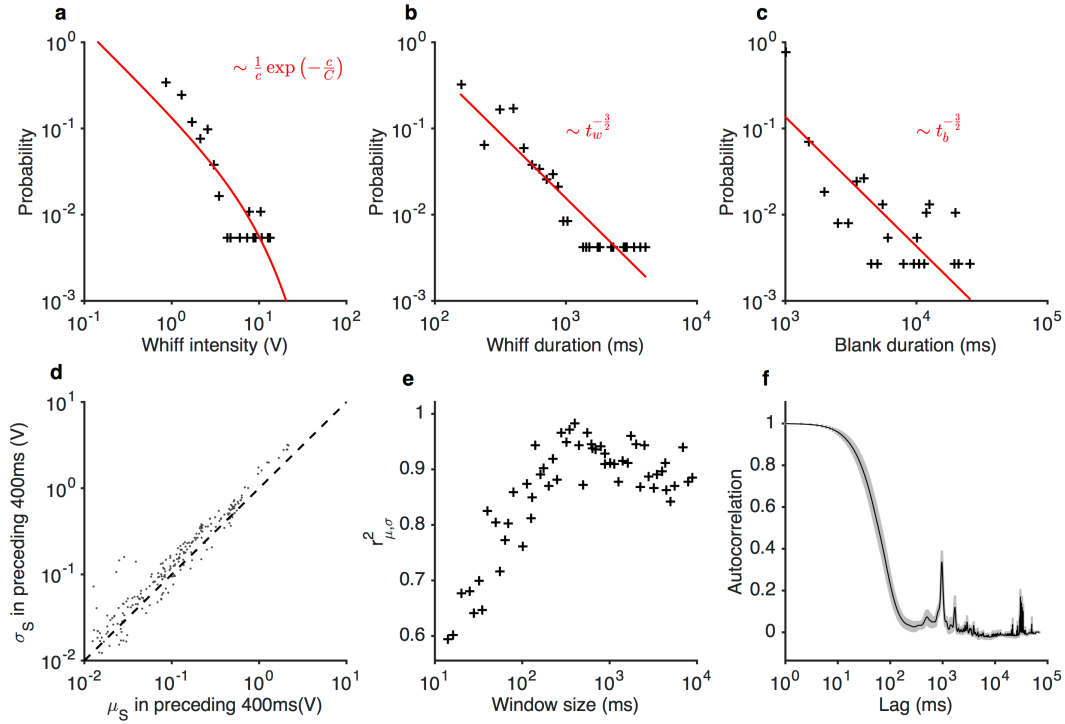

**Figure 1 — figure supplement 3: Statistics of the ethyl acetate stimulus with naturalistic temporal structure.**

(a) Distribution of whiff intensities. (b) Distribution of whiff durations. (c) Distribution of blank durations. Predicted distributions from (Celani et al., 2014) are shown in red lines (a-c).  $c$  is the odor concentration (whiff intensity).  $t_w$  and  $t_b$  are whiff and blank durations. (d) Mean vs. standard deviation of stimulus, computed in 400 ms non-overlapping blocks. (e) Correlation between mean and standard deviation of stimulus as a function of window length. Peak correlation observed for timescales  $\sim 400$  ms. (f) Autocorrelation function of the stimulus. Shading indicates standard deviation across trials.
