# Supplementary material for: Olfactory receptor neurons use gain control and complementary kinetics to encode intermittent odorant stimuli
Source: eLife journal article supplement (doi:10.7554/elife.27670), 2017-06-27
Supplement: supp [file elife_poa_e27670_Figure_1_Supplement_4.pdf › elife_poa_e27670_Figure_1_Supplement_4.pdf]

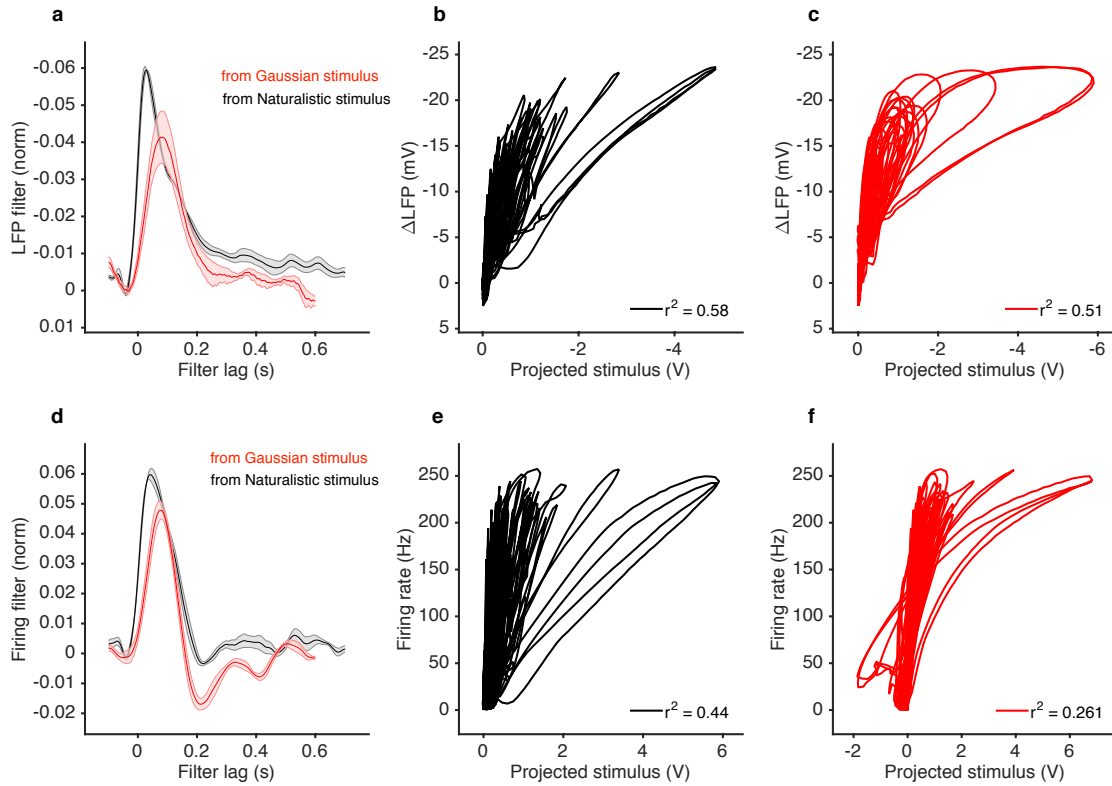

**Figure 1 – figure supplement 4. Deviations from linearity persist even when filters extracted from Gaussian stimuli are used to project naturalistic stimulus.**

(a) LFP filters for ab2A ORNs responding to 2-butanone, extracted either from naturalistic stimuli (black) or from Gaussian stimuli (red). (b) LFP responses to naturalistic stimulus vs. stimulus projected through filter computed from naturalistic stimulus (Black filter in (a)). (c) LFP responses to naturalistic stimulus vs. stimulus projected through filter computed from Gaussian stimulus (red filter in (a)). (d) Firing rate filters for ab2A ORNs responding to 2-butanone, extracted either from naturalistic stimuli (black) or from Gaussian stimuli (red). (e) Firing rate responses vs. stimulus projected through filter computed from naturalistic stimulus (black filter in (d)). (f) Firing rate responses vs. stimulus projected through filter computed from Gaussian stimulus (red filter in (d)).
