# Supplementary material for: Olfactory receptor neurons use gain control and complementary kinetics to encode intermittent odorant stimuli
Source: eLife journal article supplement (doi:10.7554/elife.27670), 2017-06-27
Supplement: supp [file elife_poa_e27670_Figure_3_Supplement_2.pdf › elife_poa_e27670_Figure_3_Supplement_2.pdf]

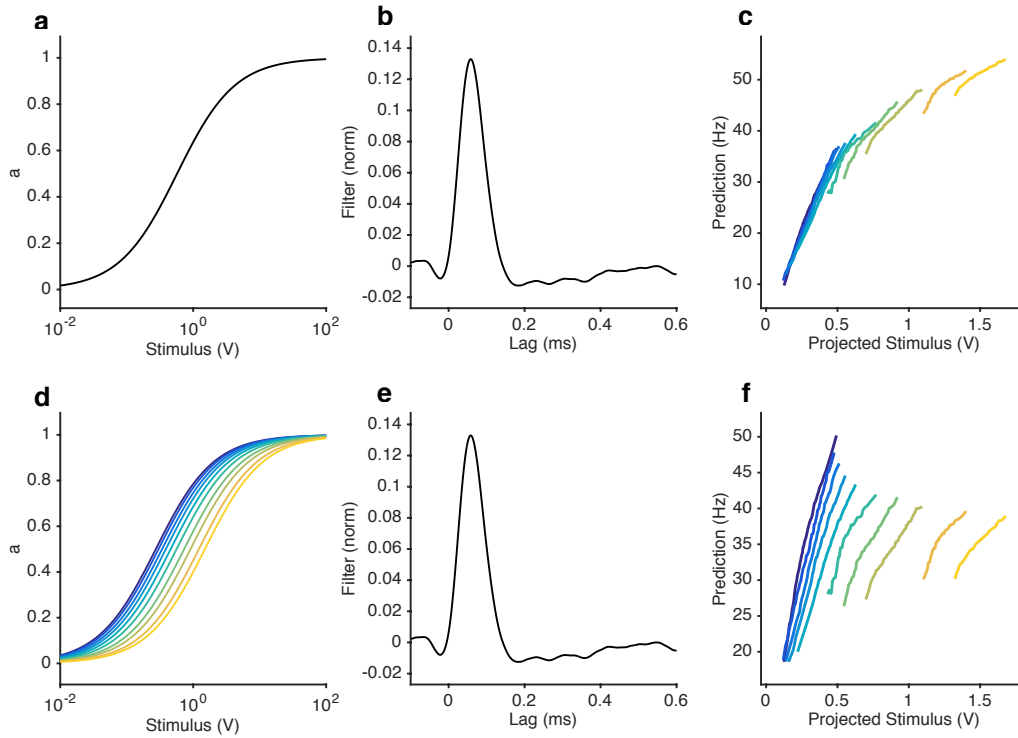

93

94 **Figure 3 — figure supplement 2. Ability of NL models to reproduce observed change in**  
 95 **input-output curves.**

96 **(a-c) Static NL model responses.** **(a)** The input nonlinearity of NL model is chosen to be a Hill  
 97 function with  $n = 1$ . **(b)** Filter of NL model, measured directly from the data. **(c)** NL model  
 98 responses vs. projected stimulus. While these curves appear to change slope with increasing  
 99 mean stimulus, mean responses also tend to increase (purple ... yellow). **(d-f) Varying NL model**  
 100 **responses, where the  $K_D$  of the input nonlinearity is allowed to vary with the mean stimulus.** **(d)**  
 101 **Input nonlinearities for stimuli with different mean (colors).** The  $K_D$  of each curve is set to the  
 102 mean stimulus of that trial. **(e)** Filter of NL model, same as in **(b)**. **(f)** Model responses vs.  
 103 projected stimulus. Note that, like in the data (**cf. Fig. 2e**), the mean response remains relatively  
 104 invariant with mean stimulus, and that curves get shallower with increasing mean stimulus.  
 105
