# Supplementary material for: Olfactory receptor neurons use gain control and complementary kinetics to encode intermittent odorant stimuli
Source: eLife journal article supplement (doi:10.7554/elife.27670), 2017-06-27
Supplement: supp [file elife_poa_e27670_Figure_3_Supplement_3.pdf › elife_poa_e27670_Figure_3_Supplement_3.pdf]

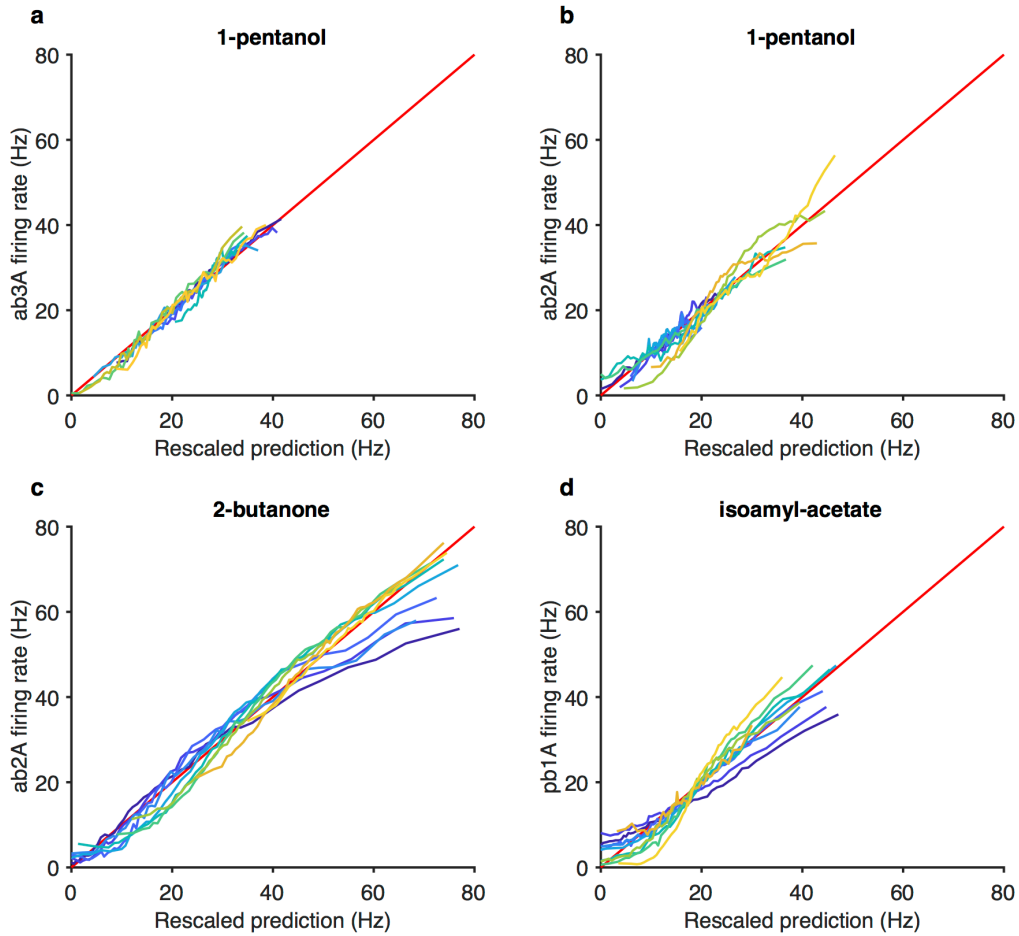

**Figure 3 — figure supplement 3. Projected stimulus rescaled by Weber-Fechner relation correlate with firing rates.**  
**(a-d)** Firing rate vs. projected stimulus rescaled by Weber-Fechner relation (as in Fig. 3g) for four additional odorant-receptor combinations. Red line is the line of unity. Same data as in **Figure 3 – figure supplement 1c-f**.
