# Supplementary material for: Olfactory receptor neurons use gain control and complementary kinetics to encode intermittent odorant stimuli
Source: eLife journal article supplement (doi:10.7554/elife.27670), 2017-06-27
Supplement: supp [file elife_poa_e27670_Figure_5_Supplement_1.pdf › elife_poa_e27670_Figure_5_Supplement_1.pdf]

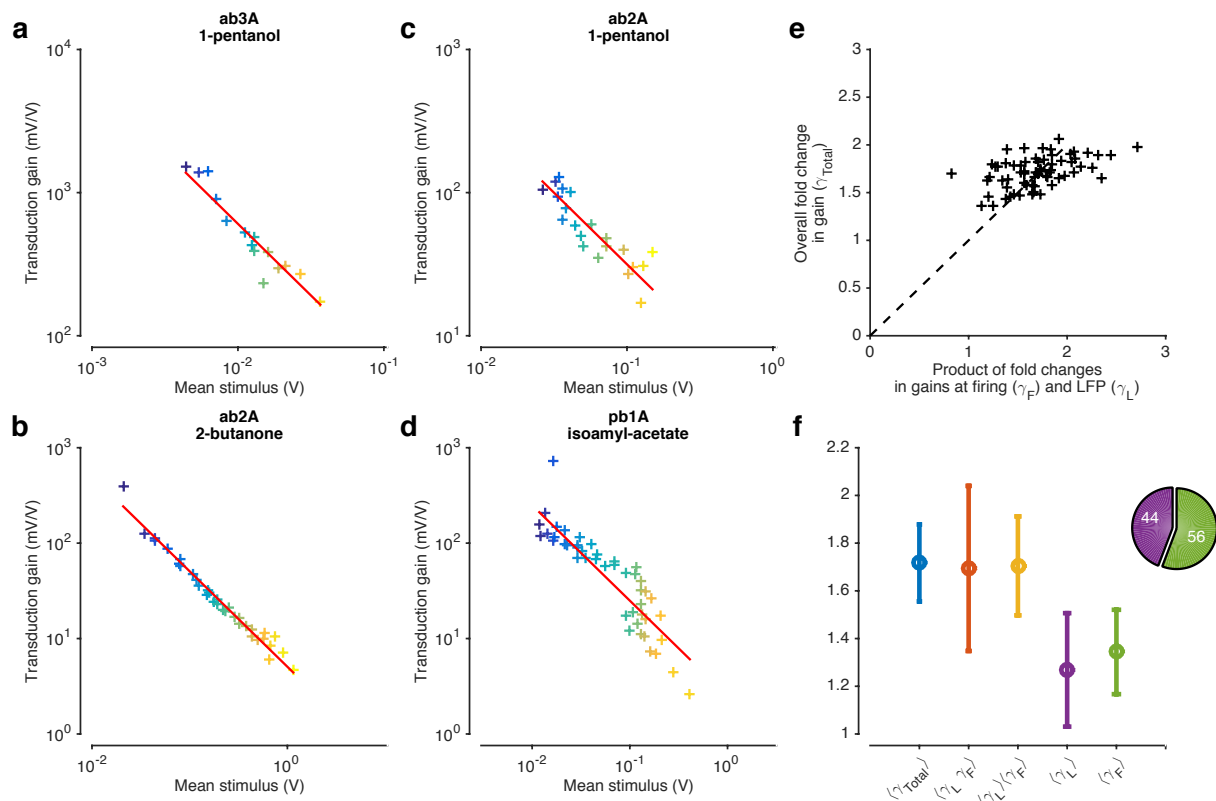

**Figure 5 — figure supplement 1. Mean and variance gain control at transduction and spiking.**

**(a-d)** Gain due to changing the mean stimulus. Transduction gain as a function of mean stimulus for different odor-receptor combinations. Red lines are power laws with exponent -1 (Weber-Fechner prediction). **(e-f)** Comparison of gain changes at transduction and firing due to changes in stimulus variance. **(e)** Trial-wise overall gain fold change ( $\gamma_{\text{Total}}$  = ORN gain at low variance/ORN gain at high variance) vs. trial-wise product of gain fold changes at transduction ( $\gamma_L$ ) and firing ( $\gamma_F$ ). **(f)** Comparison of average fold change in gain due to changing stimulus variance. Pie chart shows relative contribution (in percent) of transduction gain change (purple) and firing gain change (green) to overall gain change.
