# Supplementary material for: Olfactory receptor neurons use gain control and complementary kinetics to encode intermittent odorant stimuli
Source: eLife journal article supplement (doi:10.7554/elife.27670), 2017-06-27
Supplement: supp [file elife_poa_e27670_Figure_7_Supplement_1.pdf › elife_poa_e27670_Figure_7_Supplement_1.pdf]

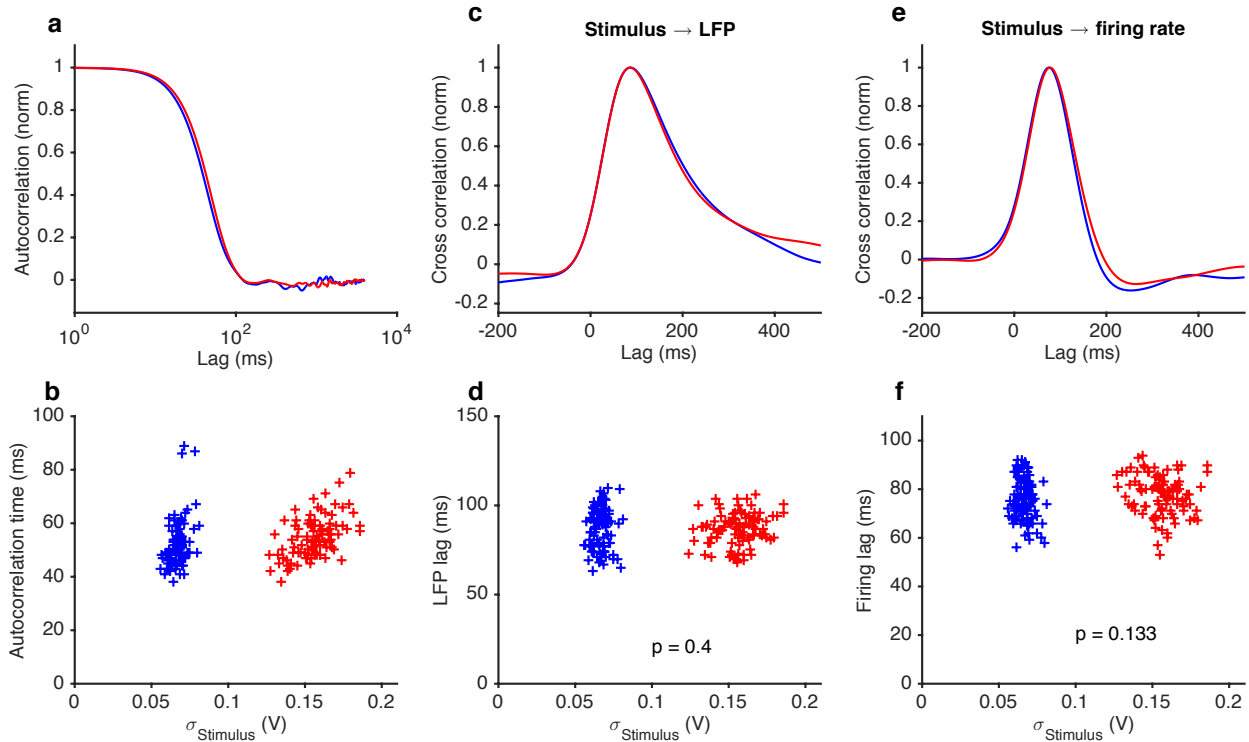

**Figure 7 – figure supplement 1. Variance gain control does not change response kinetics.** (a) Stimulus autocorrelation functions, computed during high variance epochs (red) and during low variance epochs (blue). (b) Autocorrelation time (defined as the time the autocorrelation function first drops to  $1/e$ ) vs. the standard deviation of the stimulus, for each trial. (c) Cross correlation functions from stimulus to LFP. The cross correlation functions are very similar between high (red) and low (blue) variance epochs. (d) LFP lag with respect to the stimulus, estimated from the location of the peak cross-correlation, vs. standard deviation of the stimulus. No significant change in lag was observed ( $p = 0.4$ , t-test). (e) Cross correlation functions from stimulus to firing rate. The cross correlation functions are very similar between high (red) and low (blue) variance epochs. (f) Firing rate lag with respect to the stimulus, estimated from the location of the peak cross-correlation, vs. standard deviation of the stimulus. No significant change in lag was observed ( $p = 0.133$ , t-test).
