# Supplementary material for: Olfactory receptor neurons use gain control and complementary kinetics to encode intermittent odorant stimuli
Source: eLife journal article supplement (doi:10.7554/elife.27670), 2017-06-27
Supplement: supp [file elife_poa_e27670_Figure_8_Supplement_1.pdf › elife_poa_e27670_Figure_8_Supplement_1.pdf]

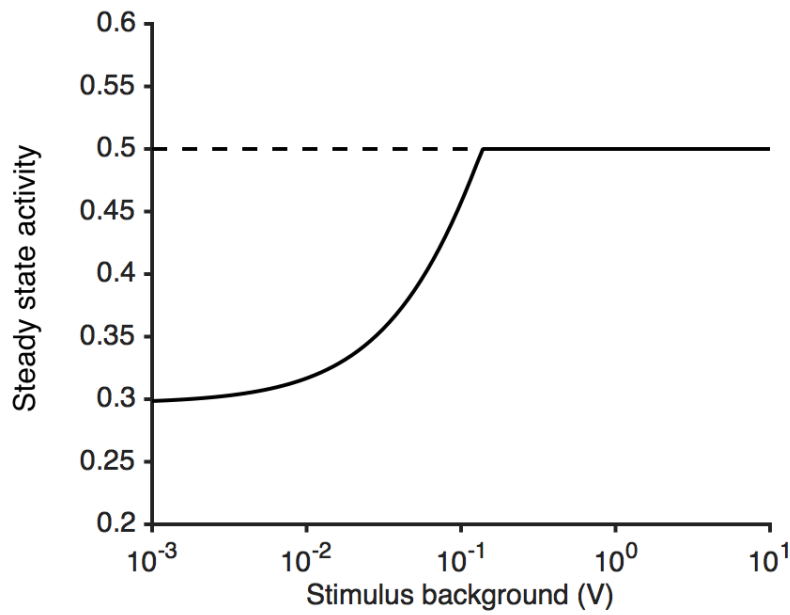

**Fig 8 – figure supplement 1. Steady state activity as a function of the stimulus background.**  
 At high stimulus background, the steady state activity of the receptor complex is  $a_0$  (here,  $1/2$ ).  
 The model is unable to adapt perfectly to lower stimulus backgrounds, since  $\varepsilon$  is bounded by  $\varepsilon_L$ .  
 This causes the steady state activity to decrease.
