# Supplementary material for: Olfactory receptor neurons use gain control and complementary kinetics to encode intermittent odorant stimuli
Source: eLife journal article supplement (doi:10.7554/elife.27670), 2017-06-27
Supplement: supp [file elife_poa_e27670_Figure_8_Supplement_2.pdf › elife_poa_e27670_Figure_8_Supplement_2.pdf]

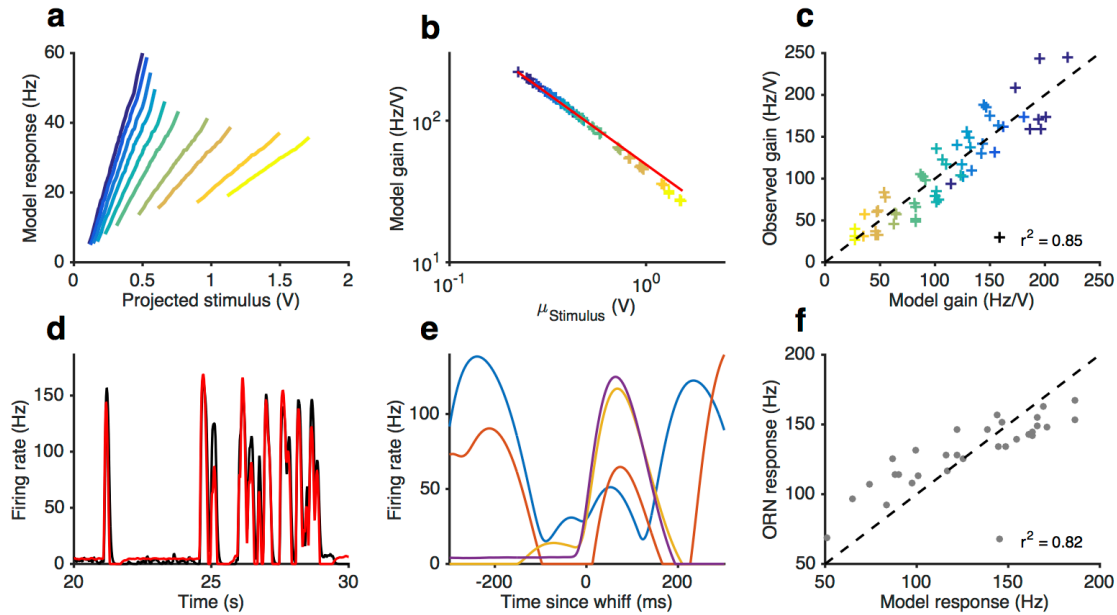

**Figure 8—figure supplement 2. Front-end adaptation followed by a LN model reproduces firing rate responses to Gaussian and naturalistic stimuli.** (a-f) Model from stimulus to firing rate (see **Methods**) fit to Gaussian and naturalistic stimuli. (a) Model responses vs. projected stimulus with increasing mean stimulus (cf. **Fig. 3**). (b) Model gain vs. mean stimulus. Red line is the Weber-Fechner prediction ( $\Delta R/\Delta S \sim 1/S$ ). (c) Firing rate gain vs. model gain. (d) Firing rate and model responses to naturalistic stimulus. (e) The model reproduces variation in the firing rate responses to similar-sized whiffs (cf. **Fig 2**). (f) Firing rate responses vs. model responses for every whiff in the naturalistic stimulus.

## References

Celani, A., Villermaux, E., Vergassola, M., 2014. Odor Landscapes in Turbulent Environments. *Phys. Rev. X* 4, 041015–17. doi:10.1103/PhysRevX.4.041015
